# Supplementary material
Source: PubMed Central journal article supplement (PMC1815275)
Supplement: pnas_0611267104_2.pdf [file pnas_0611267104_2.pdf]

Table 2. Number of CD8<sup>+</sup> T cell lines isolated from liver biopsy at week 16 postinoculation

| <u>Pool</u> | <u>Number of cell lines</u> |
|-------------|-----------------------------|
| 2           | 48                          |
| 3           | 39                          |
| 6           | 1                           |
| 7           | 4                           |
| 8           | 4                           |

CD8<sup>+</sup> cells were isolated from liver biopsy tissue at week 16 and clonally expanded in culture. Individual clones were screened for HCV specificity using cytotoxic assays against targets expressing pools of HCV peptides spanning the HCV genome including peptides from the entire ARF. Peptide pools are comprised of 15-20 mer peptides overlapping by 10 residues. Each pool is composed of peptides corresponding to residues, numbered from the beginning polyprotein: 1-214 (pool 1); 205-766 (pool 2); 757-1055 (pool 3); 1046-1365 (pool 4); 1356-1680 (pool 5); 1671-2009 (pool 6); 2000-2443 (pool 7); 2434-2735 (pool 8); 2726- 3011 (pool 9). Peptides used to screen the ARF were composed of amino acids 1-161 of the +1 frame, beginning with nucleotide 5 of the polyprotein (pool 10).
