# Supplementary material
Source: PubMed Central journal article supplement (PMC1815275)
Supplement: pnas_0611267104_3.pdf [file pnas_0611267104_3.pdf]

Table 3. Proliferating CD4<sup>+</sup> T cell clones stimulated by HCV epitope from liver biopsy at weeks 16 and 20 postinoculation

| Week | Clone | Pool | Epitope            | HCV protein | HCV AA    |
|------|-------|------|--------------------|-------------|-----------|
| 16   | 5F    | 6    | LFNILGGWVAAQLAAPGA | NS4B        | 1808-1825 |
| 16   | 9F    | 6    | LFNILGGWVAAQLAAPGA | NS4B        | 1808-1825 |
| 20   | 1C    | 2    | YANGSGLDERPYCWHY   | E2          | 474-489   |
| 20   | 8C    | 2    | MVDYPYRLWHYPCTINY  | E2          | 608-624   |
| 20   | 7E    | 5    | KLVALGINAVAYYRGLDV | NS3         | 1406-1423 |
| 20   | 3F    | 5    | YRLGAVQNEVTLTHPITK | NS3         | 1626-1643 |
| 20   | 7F    | 7    | EVSVPAEILRKSRRFARA | NS5A        | 2267-2284 |

CD4<sup>+</sup> cells were isolated from liver biopsies at weeks 16 and 20 postinoculation and expanded as individual clones in culture. The HCV epitope displayed on the CD4<sup>+</sup> cell was mapped by using a proliferation assay with the target cells presenting an individual HCV peptide.
